# Supplementary material
Source: PubMed Central journal article supplement (PMC5977389)
Supplement: NIHMS964012-supplement.pdf [file NIHMS964012-supplement.pdf]

## Supplementary data

### miR-146b probably assists miRNA-146a in the suppression of keratinocyte proliferation and inflammatory responses in psoriasis

Helen Hermann,<sup>1,\*</sup> Toomas Runnel,<sup>1,2,\*</sup> Alar Aab,<sup>1</sup> Hansjörg Baurecht,<sup>3</sup> Elke Rodriguez,<sup>3</sup> Nathaniel Magilnick,<sup>4</sup> Egon Urgard,<sup>1</sup> Liisi Šahmatova,<sup>5,6</sup> Ele Prans,<sup>5,1</sup> Julia Maslovskaja,<sup>1</sup> Kristi Abram,<sup>6</sup> Maire Karelson,<sup>6</sup> Bret Kaldvee,<sup>5,6</sup> Paula Reemann,<sup>1</sup> Uku Haljasorg,<sup>1</sup> Beate Rückert,<sup>7</sup> Paulina Wawrzyniak,<sup>7</sup> Michael Weichenthal,<sup>3</sup> Ulrich Mrowietz,<sup>3</sup> Andre Franke,<sup>8</sup> Christian Gieger,<sup>9</sup> Jonathan Barker,<sup>10</sup> Richard Trembath,<sup>11</sup> Lam C. Tsoi,<sup>12</sup> James T. Elder,<sup>13</sup> Eric R. Tkaczyk,<sup>1,14</sup> Kai Kisand,<sup>1</sup> Pärt Peterson,<sup>1</sup> Külli Kingo,<sup>5,6</sup> Mark Boldin,<sup>4</sup> Stephan Weidinger,<sup>3;#</sup> Cezmi A. Akdis<sup>7,#</sup> and Ana Rebane<sup>1,#</sup>

<sup>1</sup>Institute of Biomedicine and Translational Medicine, University of Tartu, Tartu, Estonia.

<sup>2</sup>Institute of Molecular and Cellular Biology, University of Tartu, Tartu, Estonia.

<sup>3</sup>Department of Dermatology, University Hospital Schleswig-Holstein, Christian-Albrechts-University of Kiel, Kiel, Germany.

<sup>4</sup>Department of Molecular and Cellular Biology, Beckman Research Institute of City of Hope National Medical Center, Duarte, CA, USA

<sup>5</sup>Department of Dermatology and Venereology, University of Tartu, Tartu, Estonia.

<sup>6</sup>Dermatology Clinic, Tartu University Hospital, Tartu, Estonia.

<sup>7</sup>Swiss Institute of Allergy and Asthma Research (SIAF), University of Zürich, Davos, Switzerland.

<sup>8</sup>Institute of Clinical Molecular Biology, Christian-Albrechts-University of Kiel, Kiel, Germany.

<sup>9</sup>Institute of Genetic Epidemiology, Helmholtz Zentrum München - German Research Center for Environmental Health, Neuherberg, Germany.

<sup>10</sup>Division of Genetics and Molecular Medicine, King's College London, London, UK and St John's Institute of Dermatology, King's College London, London, UK.

<sup>11</sup>Barts and the London School of Medicine and Dentistry, Queen Mary University of London, London, UK.

<sup>12</sup>Department of Dermatology, University of Michigan, Ann Arbor, MI, USA and Ann Arbor Veterans Affairs Hospital, Ann Arbor, MI, USA.

<sup>13</sup>Department of Biostatistics, Center for Statistical Genetics, University of Michigan, Ann Arbor, MI, USA

<sup>14</sup>Department of Medicine, Vanderbilt University Medical Center, Nashville, Tennessee, USA

\*These authors contributed equally to this work

#These senior authors contributed equally to this work

## **Supplementary**

### **MATERIALS AND METHODS**

#### **Patients**

Altogether, 30 patients with plaque psoriasis and 30 control subjects were included in the study, of which 22 patient samples and 22 control samples were used for RNA purification, RT-qPCR and correlation analyses (see Supplemental Table S1). 8 patient samples and 8 control samples were used for ISH and IF, of which two representative ISHs and one IF are shown. Skin samples from patients with psoriasis were collected from the Dermatology Clinic of Tartu University Hospital or from University Hospital Kiel (Germany). All of the participants were unrelated Caucasians living either Estonia or Germany. The Psoriasis Area and Severity Index (PASI) score of the patients ranged from 2 to 27.6. Control subjects were recruited from among health care personnel, medical students and patients who turned to dermatological outpatient clinic for surgical excision of nevi. None of control subjects had any history of chronic skin disease or family history of psoriasis. Two punch biopsy skin samples (3-4 mm in diameter) were taken from each patient with psoriasis, one from the marginal zone of lesional skin and another from non-sun-exposed non-lesional skin. One punch biopsy skin sample (3-4 mm in diameter) from non-sun-exposed skin was taken from each control subject. The skin samples were immediately frozen using dry ice or liquid nitrogen and stored at -80°C until RNA extraction. For *in situ* hybridization and immunofluorescence, skin biopsy specimens were embedded into the Tissue-Tek (Thermo Scientific, Waltham, Mass) before freezing.

#### **Human cell culture**

Pooled, normal human epidermal keratinocytes (Promocell, Heidelberg, Germany) were cultured and stimulated as described previously (Rebane *et al.*, 2014). Human primary fibroblasts were cultured in Dulbecco's Modified Eagle Medium (Life Technologies, Grand Island, NY) as described in (Reemann *et*

*al.*, 2014). Human PBMCs were isolated from peripheral blood by using density gradient centrifugation on Ficoll (Biochrom, Berlin, Germany) as described previously (Tserel *et al.*, 2011). The following concentrations of cytokines were used: TNF- $\alpha$  25 ng/ml, IL-1 $\beta$  10 ng/ml, IFN- $\gamma$  10 ng/ml, IL-17A 10 ng/ml, IL-22 10 ng/ml (PeproTech, London, United Kingdom). For 3D keratinocyte culture in air-liquid interface (ALI),  $5 \times 10^5$  cells were seeded on ThinCert Cell Culture Inserts (0,4  $\mu\text{m}$  pore, 0.33  $\text{cm}^2$ ) on 24-well plates (Greiner Bio-One, Kremsmünster, Austria) using Keratinocyte-SFM medium with supplements and Dulbecco's Modified Eagle Medium (both from Life Technologies, Grand Island, NY) containing High Glucose, GlutaMAX™ and Pyruvate in 1:1 ratio. To monitor the quality of 3D culture, transepithelial resistance (TER) was measured in every 24 h using Millicell ERS-2 Voltohmmeter (Merk Millipore, Darmstadt, Germany).  $2 \times 10^4$  keratinocytes per one well of 12-well or  $5 \times 10^3$  cells per one well of 96-well (Figure 3a, b and 5b) plate was seeded 24 hours before the transfection in 1.0 ml or 100  $\mu\text{l}$  of Keratinocyte-SFM with supplements (Life Technologies), respectively. The transfection with siPORT NeoFX (Life Technologies, Grand Island, NY) was performed according to the manufacturer's instructions. 3  $\mu\text{l}$  or 0.3  $\mu\text{l}$  of siPORT NeoFX (Life Technologies, Grand Island, NY) per one well of 12-well or 96-well plate was used, respectively. Transfection with PepFect14 was used for Figure 5b and was performed as in (Urgard *et al.*, 2016). Briefly, miRNA mimics at 2:1 PepFect14-miRNA charge ratio (molar ratio 17:1) were incubated in 60  $\mu\text{l}$  of water at room temperature for 1 h, then mixed with 0.6 ml of the growth media and shared to the cells in six wells of 96-well plate after removing the old growth media. After 24 h, keratinocytes were stimulated with cytokines as indicated for 48 h. Transfections in keratinocytes were performed at 60 nM of Pre-miR Precursors Molecule hsa-miR-146a, and Pre-miR Negative Control #1 or at 30 nM of miRNA mimic 2.0, miR-146b-5p and mirVana miRNA Mimic, Negative Control #1 (all from Life Technologies) and miRCURY LNA™ inhibitors (microRNA Power inhibitor hsa-miR-146a, has-miR-146 and Negative Control A, Exiqon, Vedbaek, Denmark). Silencer Select siRNAs for

IRAK1 (s323), CARD10 (s26577), FERMT1 (s31076) and negative control #1 (Life Technologies) were used at 50 nM concentration.

### ***In situ* hybridization (ISH)**

ISH was performed on 10 µm frozen sections using microRNA ISH Buffer, Controls Kit and 5`-DIG and 3`-DIG labeled hsa-miR-146a-5p (619856-360) and hsa-miR-146b (615935-360) miRCURY LNA™ Detection probes according to the manufacturer's protocol (Exiqon). Prehybridization, hybridization and washings were performed at 50 °C for miR-146a and at 48 °C for miR-146b. For detection, slides were incubated with alkaline phosphatase-conjugated sheep anti-DIG-AP (1:1500, Roche, Basel, Switzerland) for 1h at room temperature. The staining was visualized by adding BM purple AP substrate (Roche).

### **Array, pathway and target analysis**

To study miR-146a impact in unstimulated keratinocytes, a previously published dataset, E-MTAB-1739 (Rebane *et al.*, 2014), was reanalyzed. The array data were analyzed with GenomeStudio 2011.1 Gene Expression Module using Average Normalization for miRNA data and Illumina's custom rank invariant method for mRNA arrays. Genes were considered differentially expressed at adjusted  $P < 0.05$ . Further analyses and visualizations were performed using Microsoft Excel and Multi Experiment Viewer 4.8.1. Pathway analysis was performed with g:Profiler (<http://biit.cs.ut.ee/gprofiler>), which estimates significance of the overlap between the functional groups and the list of studied genes by calculating enrichment P-value using Fisher's one-tailed test. Putative direct targets for miR-146a were selected using Targetscan search choosing only highly conserved and those with better context score ( $< -0.15$ ) (Friedman *et al.*, 2009; Garcia *et al.*, 2011).

### **Isolation of RNA, cDNA synthesis and RT-qPCR**

Total RNA was extracted using miRNAeasy Mini Kit (Qiagen) or Direct-zol RNA MiniPrep kit (Zymo Research (Irvine, CA)). cDNA was synthesized from 100-900 ng of total RNA using oligo-dT and reagents from Thermo Scientific. RNA concentration was assessed with NanoDrop ND-1000. 5x HOT FIREPol EvaGreen qPCR Supermix (Solis BioDyne, Tartu, Estonia) and ABI Prism 7900 or Via7 were used for qPCR. The relative gene expression levels were normalized to the level of human *EEF1A1* or mouse *Hprt* and calculated using the comparative Ct ( $\Delta\Delta C_t$ ) method (Life Technologies). PCR primers were designed with assistance of Primer 3 and were ordered from Microsynth, Balgach, Switzerland or TAG Copenhagen (Copenhagen, Denmark). miRNA qPCR was carried out using TaqMan microRNA Assays (Life Technologies) and using 5x HOT FIREPol® Probe qPCR Mix Plus (ROX) (Solis BioDyne). miRNA RT-qPCR results were normalized to *let-7a*. Relative expression is shown compared to the mean of control experiments or control group (=1) both in mRNA and miRNA RT-qPCR.

### **Proliferation assays**

KCs were transfected on 96-well plate as described above. Cytokines were added after 24 hours and  $^3\text{H}$  thymidine (Hartmann Analytic) at end-concentration of 1  $\mu\text{Ci/ml}$  after 48 hours. During cell-division,  $^3\text{H}$  thymidine was incorporated into the replicating DNA. After 14 hours, cells were harvested onto a glass-fiber filter, mounted with a cocktail containing scintillation liquid and the counts were monitored.  $\beta$ -counts of the control cells were in the range of  $2.7 \times 10^4$  and  $1.2 \times 10^6$  counts per minute (cpm). Alternatively, after 24h of the transfection, cell proliferation was analyzed using CellTiter-Glo® Luminescent Cell Viability Assay (Promega, Madison, Wis) in which the measured Luciferase activity is proportional with the amount of cellular ATP.

### qPCR primers

The following primers were used to detect human mRNAs: FERMT1 for: 5'-TGATGCAGCCACCGGGATTCCA-3', FERMT1 rev: 5'-CGA TGACCACCTGCCGGGTTC-3', NUMB for: 5'-AATGCCTTCAGCACACCTGA-3', NUMB rev 5'-AGTC AGTGCCATTAGCTTGGAA-3', Hprt for 5'-CTCTCGAAGTGTGGATACAG-3', Hprt rev 5'-ACAAACGTGATTCAAATCCCC-3'. Sequences for human and CCL5, IRAK1, EEF1A1 (EF1A), human IL-8 and mouse Ccl5, Cxcl1, Irak and Card10 primers have been provided before (Rebane *et al.*, 2014).

### Cloning and Luciferase assay

3'UTR fragments containing binding sites for miR-146a and the mutant binding sites of FERMT1 were cloned into the pmirGLO Dual-Luciferase miRNA Target Expression Vector (Promega) using the PCR primers containing NheI and Sall sites. The following primers were used: FERMT1-1 3'UTR for: 5'-ATTGCTAGCACCCACTGCTGGCACATCCCT-3', FERMT1-1 3'UTR rev: 5'-ATTGTCGACGCAGTTCC ATGAAGGACAGGCG-3', FERMT1-2 3'UTR for: 5'-ATAGCTAGCATTAAACAGCTGCCTGAATT-3', FERMT1-2 3'UTR rev: 5'-ATAGTCGACAAGTCTGTCTCTATGTGGCT-3', FERMT1-1 3'UTR for mut: TGGTTACAGTAGTCTGACTTGC, FERMT1-1 3'UTR rev mut: GCA AGTCAGACTACTGTAACCA, FERMT1-2 3'UTR for mut: ATTTTTCAGTAGTCCTAGGATG, FERMT1-2 3'UTR rev mut: CATCCTAGGACTACTGAAAAAT. Transfections were carried out in 24-well plates using 0.8 µl of siPORT NeoFX (Life technologies), 30 nM of pre-miRNAs (Pre-miR™ Precursors Molecules hsa-miR-146a or Negative Control #1, Life Technologies), 50 ng of the reporter plasmid and  $2 \times 10^4$  human embryonic kidney epithelial cells HEK293 in 0.6 ml medium for 24 h. Firefly and renilla luciferase activities were measured using Dual-Luciferase® Reporter Assay System (Promega). Firefly luciferase activities were normalized to the values of the renilla luciferase.

## **Immunofluorescence**

10 µm cryosections of skin biopsy specimens were fixed for 10 min with 4% formaldehyde in PBS followed by permeabilization with 0.1% Triton-X-100 in PBS for 10 min and blocking in 10% goat serum and 0.5% BSA (Sigma) in PBS for 1 hour. Specimens were further incubated for 1 hour either with rabbit polyclonal anti-FERMT1 or KRT10 antibodies (Atlas antibodies, Stockholm, Sweden). Alexa-488 labeled anti-rabbit-IgG (Life Technologies) with dilutions of 1:2000 was used as secondary antibody. Before and after antibody incubations, specimens were washed 3x5 min with PBS. As the last 10 min washing step, 1 µg/ml of 4',6-diamidino-2-phenylindol (DAPI) (Roche, Switzerland) in PBS was added. Slides were mounted with StayBrite Hardset Mounting Medium, (Biotium USA) and analyzed with Leica DM5500 B microscope (Leica Microsystems, Germany).

## **Generation of mice with a targeted deletion of miRNA-146b, mouse strains and maintenance**

The miR-146b<sup>-/-</sup> mice were generated by deleting approximately 938 bp of genomic sequence that encompasses the miR-146b precursor on mouse chromosome 19. The linearized targeting cassette, containing two LoxP sites flanking the miR-146b genomic locus and a neomycin resistance gene flanked by FRT sites, was electroporated into C57BL/6N embryonic stem (ES) cells. Three correctly targeted ES cell lines were used for blastocyst injection and the generation of chimeric mice. The resulting chimeric mice were bred with C57BL6/J mice to obtain offspring with the targeted miR-146b locus in the germline (F1 generation). F1 mice were crossed with Cre-deleter mice (C57BL/6J-Tg(EIIA-Cre)) to remove the miR-146b locus and the neomycin selection cassette in the germline. The heterozygous miR-146b<sup>+/-</sup> mice were then interbred to homozygosity. MiR-146b<sup>-/-</sup> mice were generated at the Department of Molecular and Cellular Biology, Beckman Research Institute of City of Hope National Medical Center, Duarte, CA. The related animal experiments were approved by the Institutional Animal Care and Use Committee of City of Hope. miR-146a<sup>-/-</sup> mice in C57BL/6J background and C57BL/6J (B6)WT mice were



purchased from the Jackson Laboratory (Bar Harbor, Me). Before the isolation of keratinocytes, strains were maintained and bred either in the animal facility at the Laboratory Animal Centre at the Institute of Biomedicine and Translational Medicine, University of Tartu in accordance with the institute's regulations.

### **Isolation and culture of mouse skin keratinocytes and fibroblasts**

For isolation of skin keratinocytes and fibroblasts, six-to seven-week-old and five- to six-week-old male mice were used, respectively. Isolation and short-term culture of keratinocytes and fibroblasts was performed according to (Lichti *et al.*, 2008). Separation of epidermis from the dermis of adult mouse skin was conducted with incubation with Dispase II (Life Technologies) at 4°C for overnight. For fibroblasts, the dermis was additionally incubated with 2 ml of 0.35% collagenase Type II (Gibco) at 37°C for 30 minutes in a shaking incubator at low speed and for 10 more minutes with added 12.5 µl of DNase (Zymo Research) per dermis. To achieve a single cell suspension, keratinocytes and fibroblasts were then incubated with 0.05% trypsin at 37°C for 15 minutes and collected separately using 70 µm cell strainers (BD Falcon). Keratinocytes were further cultured in Keratinocyte-SFM medium with supplements (Life Technologies) for 2 days and fibroblasts in Dulbecco's Modified Eagle Medium (Life Technologies, Grand Island, NY) for 4 days before stimulation with 25 ng/ml of TNF- $\alpha$  or 10 ng/ml of IL-17A (PeproTech, London, United Kingdom) for 48 hours.

### **Statistical analyses**

Statistical analyses for RT-qPCR results, flow cytometry and proliferation assays were performed by ANOVA when more than 2 conditions were compared or Student's t-test, otherwise. *Post-hoc* analysis were Bonferroni corrected and the results were considered significant at  $P < 0.05$  (\*) and highly significant at  $P < 0.01$  (\*\*). Based on observations from the current study, miR-146a/b and 5 direct target

genes regulated by miR146a/b were selected. Association of SNPs in miR146a/b and these target genes ( $\pm 50$  kb) was analyzed *in silico* using data from a meta-analysis of genome-wide association studies (GWAS) with a total of 4,489 psoriasis cases and 8,240 controls. Details of the meta-analysis have been previously reported (Baurecht *et al.*, 2015). SNPTEST was used to associate the imputed dosage for each SNP with psoriasis status separately in each study sample with adjustment for the first three principal components from a multidimensional scaling (MDS) analysis of population stratification. The association test results of those SNPs with relatively high confidence (PROPER\_Info>0.4) were then meta-analyzed with METAL using the inverse-variance method based on a fixed-effect model. To address multiple testing, P-values were Bonferroni-corrected by the number of selected target regions resulting in a significance threshold of  $0.05/7=0.00714$ . Association analysis of rs2910164 genotypes and stratification of patients based on the presence of HLA-Cw\*0602 allele was performed using logistic regression models. The models were adjusted for gender and the first 4 principal components to account for ethnic differences.

## Supplementary

### REFERENCES

Baurecht H, Hotze M, Brand S, Buning C, Cormican P, Corvin A, *et al.* Genome-wide comparative analysis of atopic dermatitis and psoriasis gives insight into opposing genetic mechanisms. *Am J Hum Genet* 2015; 96:104-20.

Friedman RC, Farh KK, Burge CB, Bartel DP. Most mammalian mRNAs are conserved targets of microRNAs. *Genome Res* 2009; 19:92-105.

Garcia DM, Baek D, Shin C, Bell GW, Grimson A, Bartel DP. Weak seed-pairing stability and high target-site abundance decrease the proficiency of Isy-6 and other microRNAs. *Nat Struct Mol Biol* 2011; 18:1139-46.

Jozefczuk J, Drews K, Adjaye J. Preparation of mouse embryonic fibroblast cells suitable for culturing human embryonic and induced pluripotent stem cells. *J Vis Exp* 2012.

Lichti U, Anders J, Yuspa SH. Isolation and short-term culture of primary keratinocytes, hair follicle populations and dermal cells from newborn mice and keratinocytes from adult mice for in vitro analysis and for grafting to immunodeficient mice. *Nature protocols* 2008; 3:799-810.

Rebane A, Runnel T, Aab A, Maslovskaja J, Ruckert B, Zimmermann M, *et al.* MicroRNA-146a alleviates chronic skin inflammation in atopic dermatitis through suppression of innate immune responses in keratinocytes. *The Journal of allergy and clinical immunology* 2014; 134:836-47 e11.

Reemann P, Reimann E, Ilmjarv S, Porosaar O, Silm H, Jaks V, *et al.* Melanocytes in the skin--comparative whole transcriptome analysis of main skin cell types. *PLoS one* 2014; 9:e115717.

Tserel L, Runnel T, Kisand K, Pihlap M, Bakhoff L, Kolde R, *et al.* MicroRNA Expression Profiles of Human Blood Monocyte-derived Dendritic Cells and Macrophages Reveal miR-511 as Putative Positive Regulator of Toll-like Receptor 4. *The Journal of biological chemistry* 2011; 286:26487-95.

Urgard E, Lorents A, Klaas M, Padari K, Viil J, Runnel T, *et al.* Pre-administration of PepFect6-microRNA-146a nanocomplexes inhibits inflammatory responses in keratinocytes and in a mouse model of irritant contact dermatitis. *Journal of controlled release : official journal of the Controlled Release Society* 2016; 235:195-204.

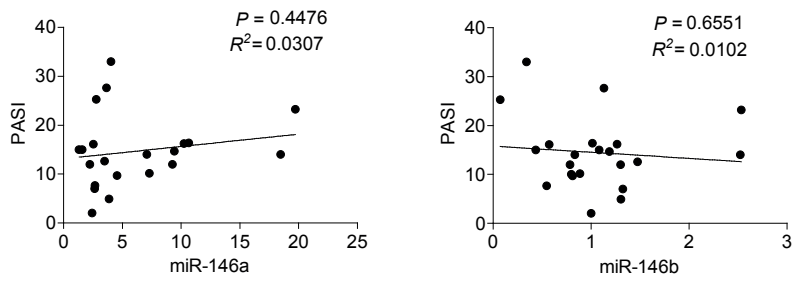

**Figure S1. Correlation analysis of miR-146a/b expression and psoriasis severity.** The relative expression levels of miR-146a/b in lesional skin of psoriasis patients and the Psoriasis Area and Severity Index (PASI) score were included in the correlation analysis.

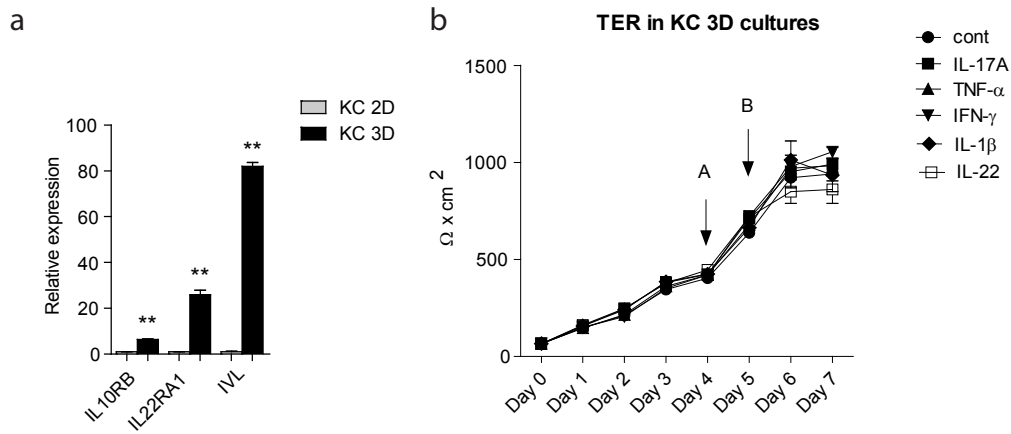

**Figure S2. Relative expression of marker genes and transepithelial resistance measurements of keratinocyte 3D cultures.** (a) Keratinocytes were grown either in proliferating conditions (KC 2D) or in KC 3D culture, data represent the mean  $\pm$  SEM of three different experiments. Relative expression of indicated genes in KC 3D was measured compared to the value in KC 2D (=1), Student's t-test,  $^{**}P < 0.01$ . (b) 50,000 KCs was seeded per each well on day 0. The apical media was removed on day 4 (A), after 24h (B), KC 3D cultures were stimulated with indicated cytokines for 48h or left unstimulated (us). High expression of involucrin (IVL) and enhancement of transepithelial resistance confirmed the establishment of epidermis.

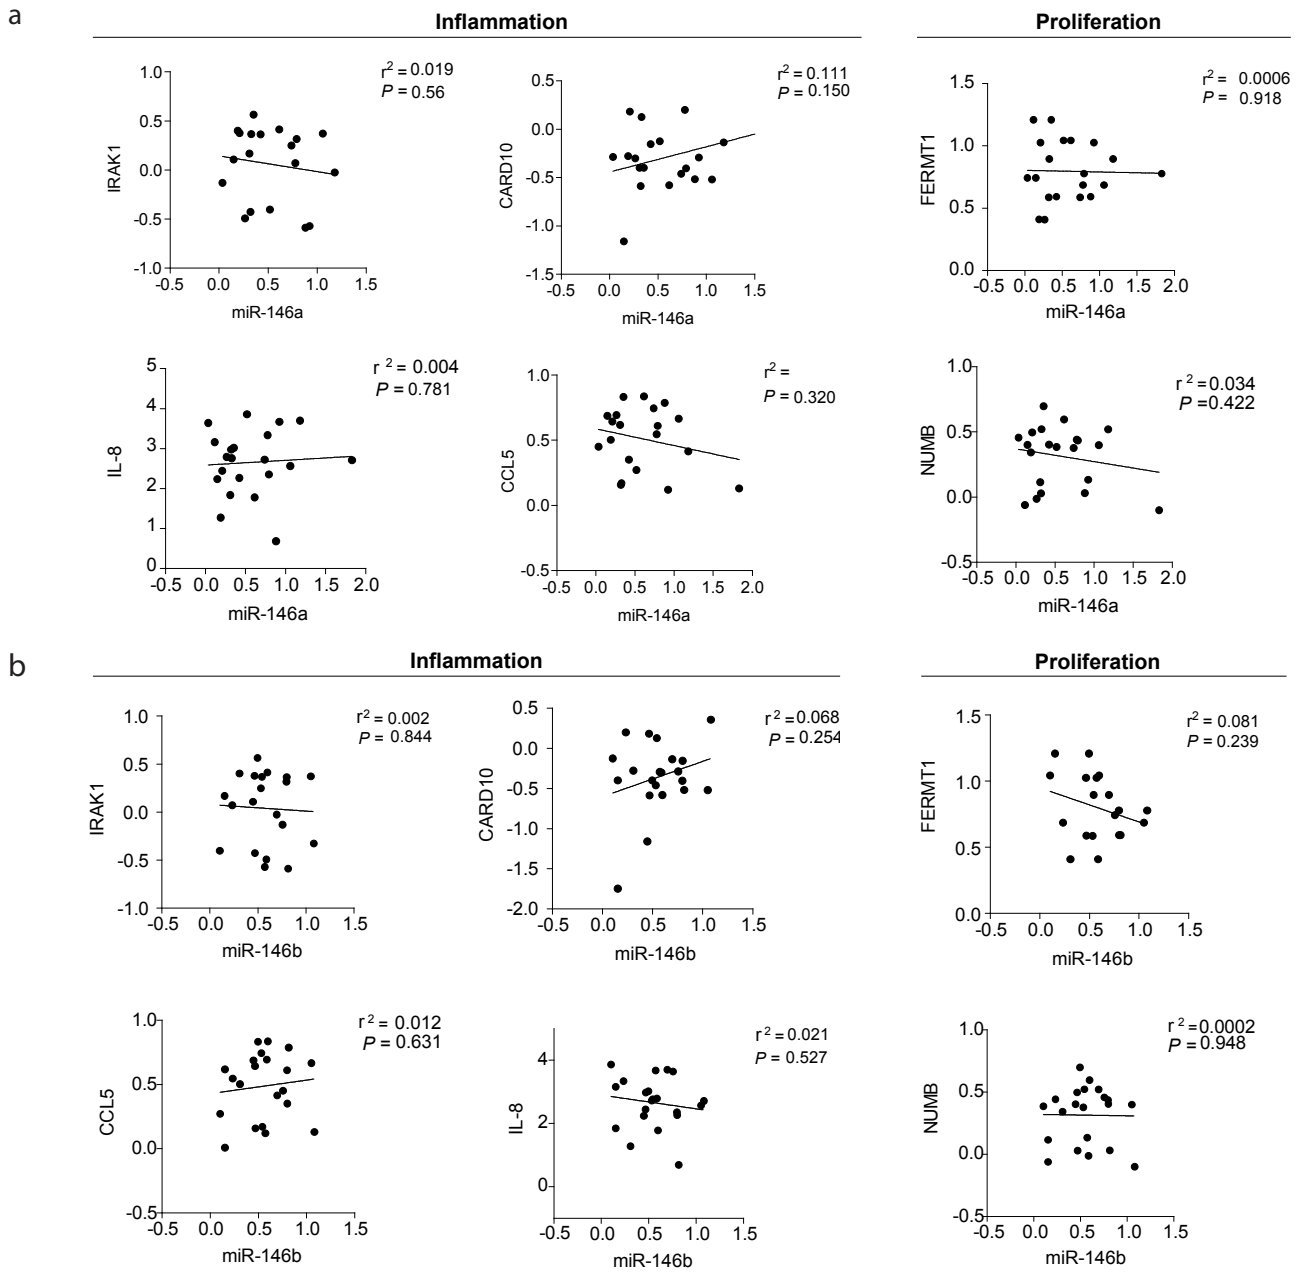

**Figure S3. Correlation analysis miR-146a/b and target genes in the skin of psoriasis patients.** Log10 values of relative expression of indicated mRNAs and miR-146a (a) and miR-146b (b) in lesional skin of psoriasis patients are included in the analysis.

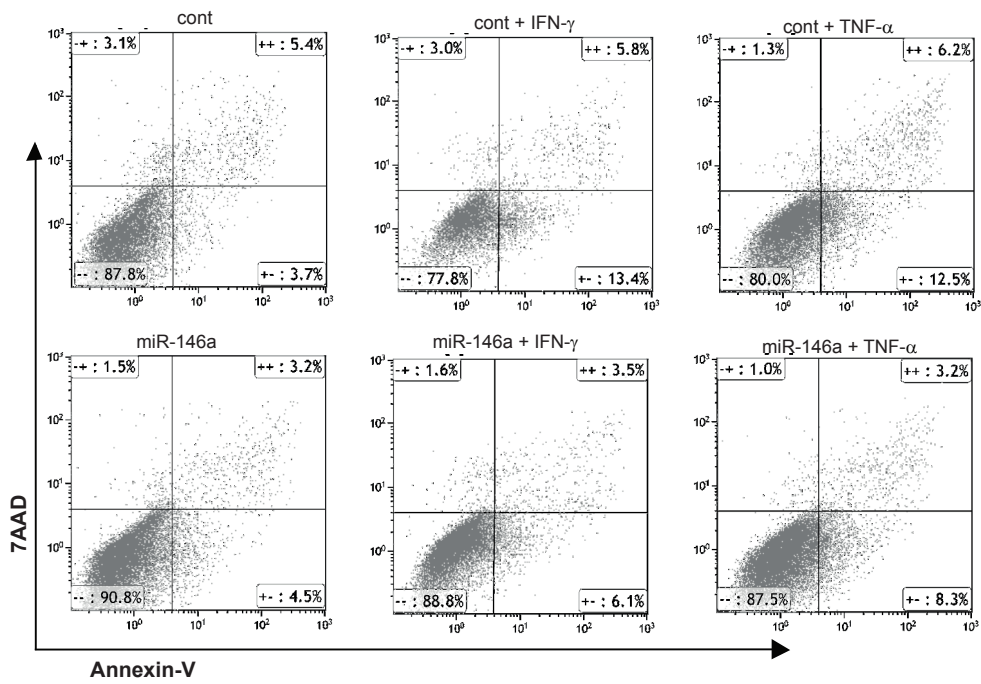

**Figure S4. miR-146a has capacity to inhibit activation-induced apoptosis of human primary keratinocytes.** Keratinocytes were transfected either with control (cont) or pre-miR-146a (miR-146a) for 24 h and then stimulated with IFN- $\gamma$  or TNF- $\alpha$  72 h or left unstimulated (us). The percentage of Annexin-V positive cells unstimulated (us) or stimulated primary KCs is presented. One representative experiment is shown.

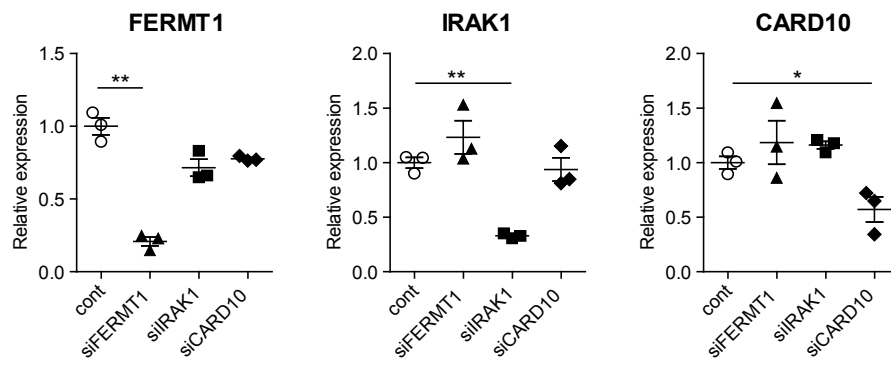

**Figure S5. The efficiency of FERMT1, IRAK1 and CARD10 siRNAs.** Keratinocytes transfected either with scrambled (cont) or indicated specific siRNAs for 24 h. Data represent the mean  $\pm$  SEM Student's t-test, \* $P < 0.05$ , \*\* $P < 0.01$ .



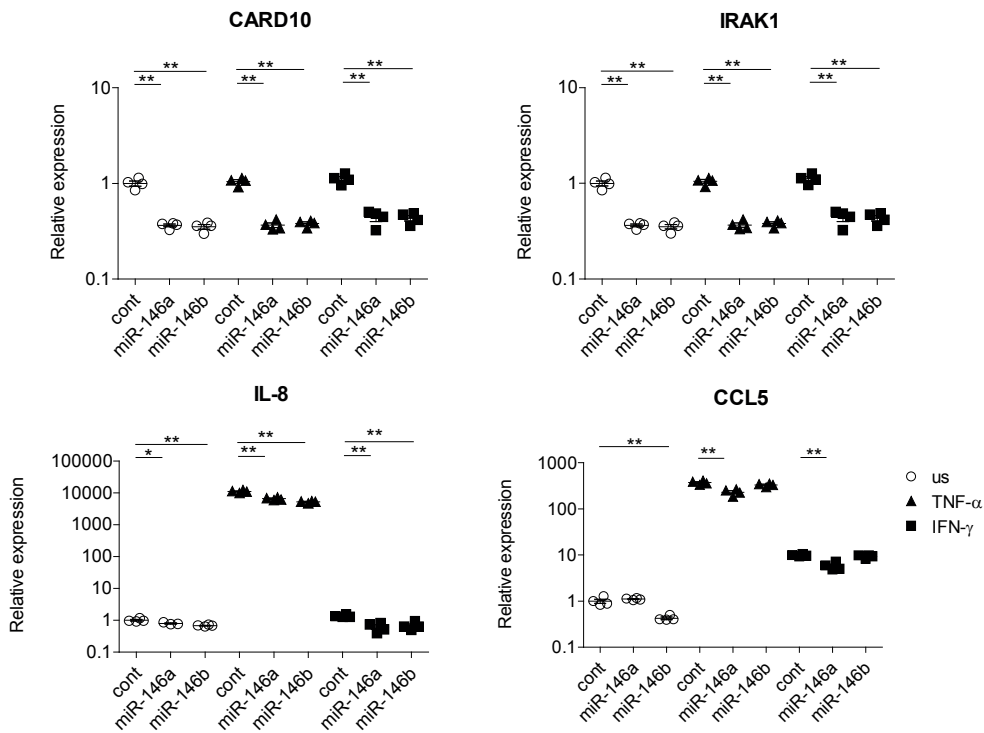

**Figure S6. miR-146a/b inhibit the target genes in a similar extent in fibroblasts.** Human primary skin fibroblasts were transfected either with control (cont) or miR-146a or miR-146b mimics. Relative expression compared to unstimulated cells (=1) is shown. Where indicated, the cells were stimulated with IFN- $\gamma$  or TNF- $\alpha$  for 48 h or left unstimulated (us). Data represent mean  $\pm$  SEM. Student's t-test, \*  $P < 0.05$ , \*\*  $P < 0.01$ . Note that FERMT1 and NUMB were not analyzed in fibroblasts as their expression was not detectable.

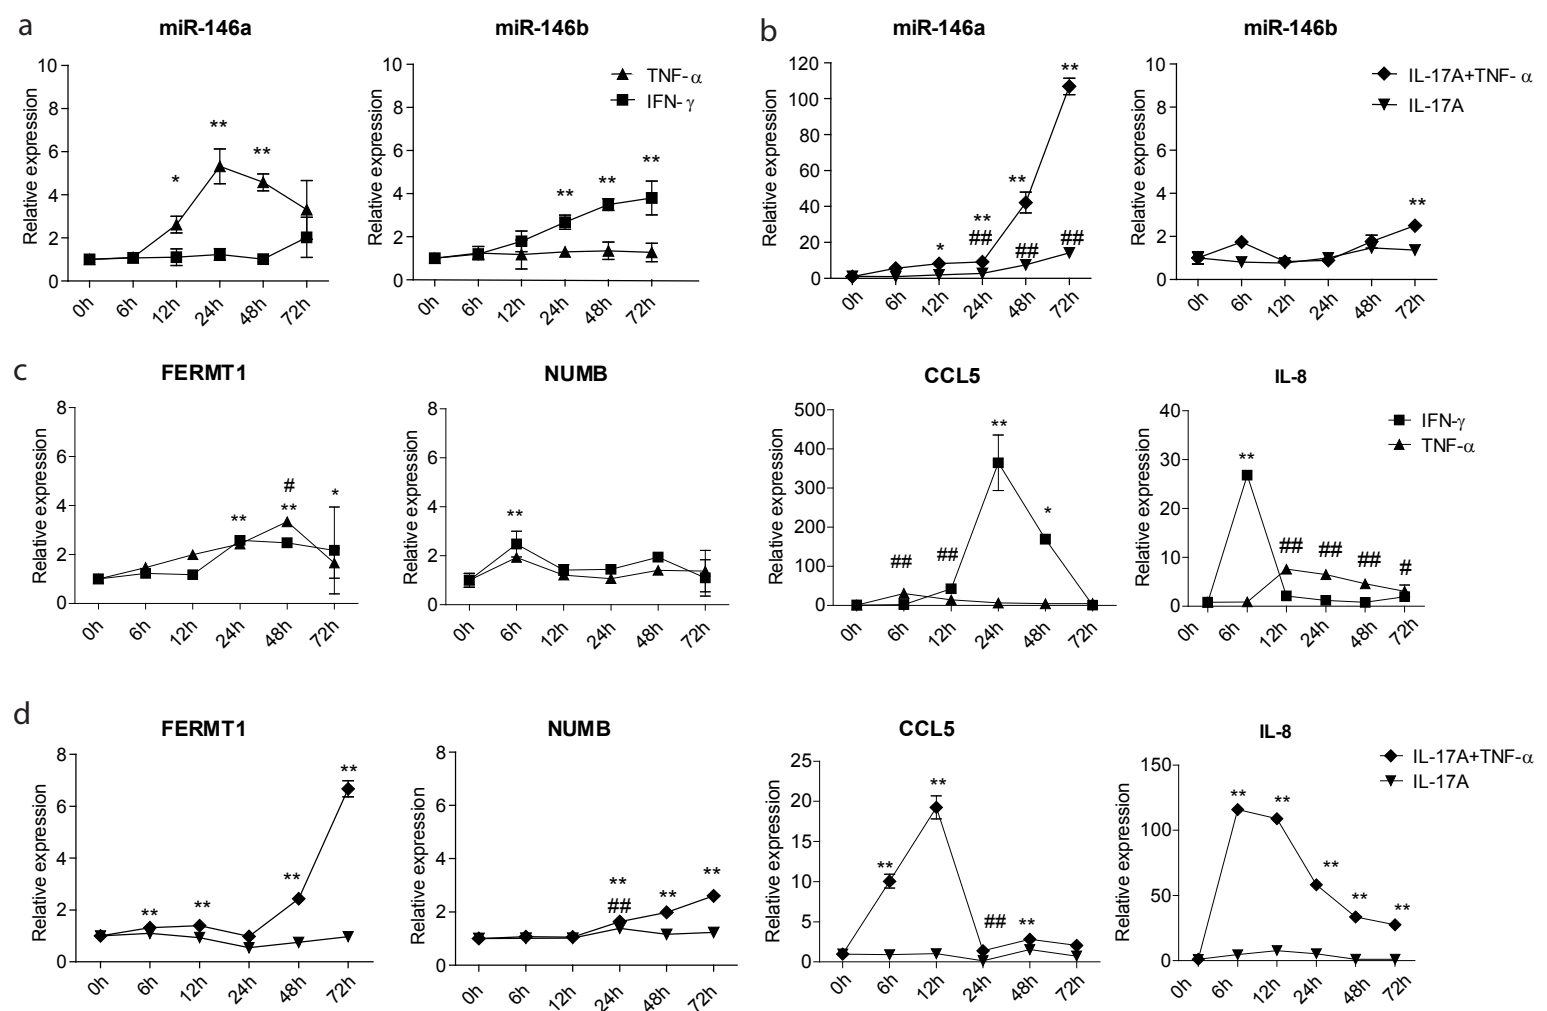

**Figure S7. Relative expression of miR-146a/b and targets in keratinocytes.** Keratinocytes were stimulated with indicated cytokines for 6, 12, 24, 48 or 72h or left unstimulated. Relative expression compared to unstimulated cells in each timepoint is shown. Data represent mean  $\pm$  SEM of three different stimulations. Two-way ANOVA Bonferroni post-test, \*  $P < 0.05$ , \*\* $P < 0.01$ ; #  $P < 0.05$  ##  $P < 0.01$  when stimulated with TNF- $\alpha$  or IL-17A.

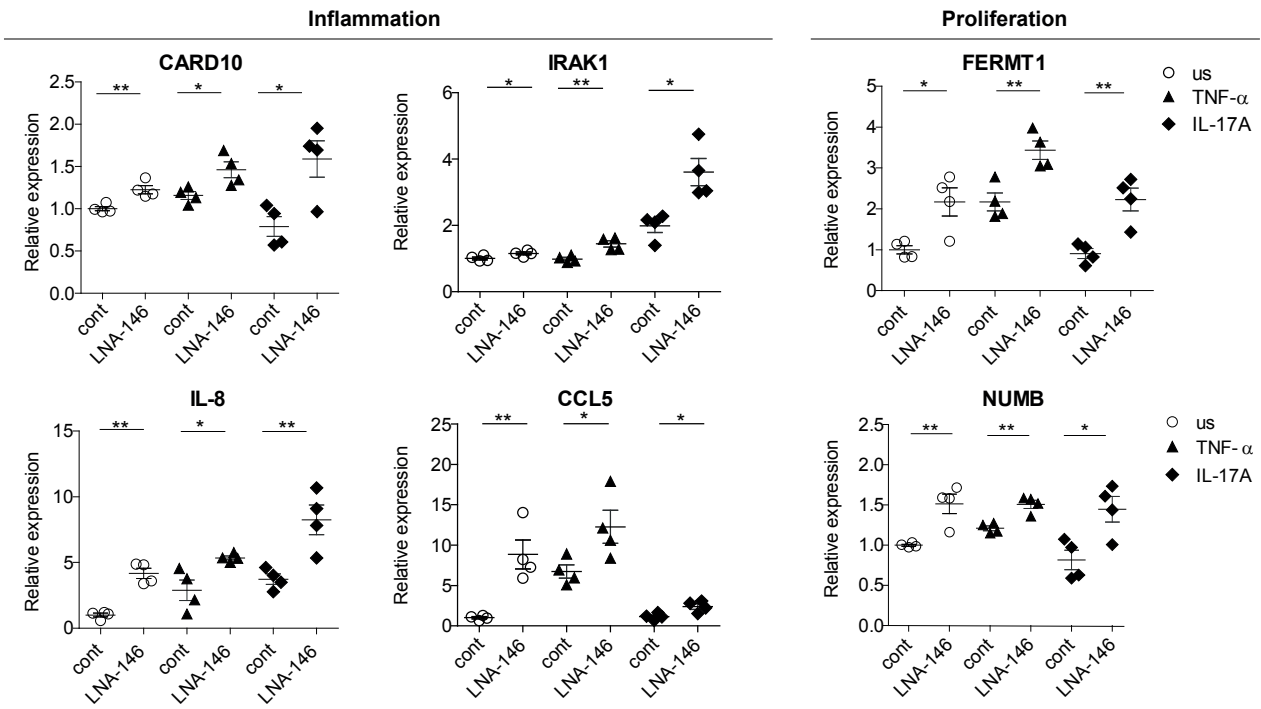

**Figure S8. LNA inhibition of miR-146a/b leadst to the increased expression of the target genes.** Keratinocytes were transfected either with the control LNA (cont) or LNA inhibitor for miR-146a/b (LNA-146) and stimulated with indicated cytokines for 48 h or left unstimulated (us). Data represent mean  $\pm$  SEM of eight independent stimulations of cells from two mice in each group. Student's t-test, \* P < 0.05, \*\* P < 0.01.

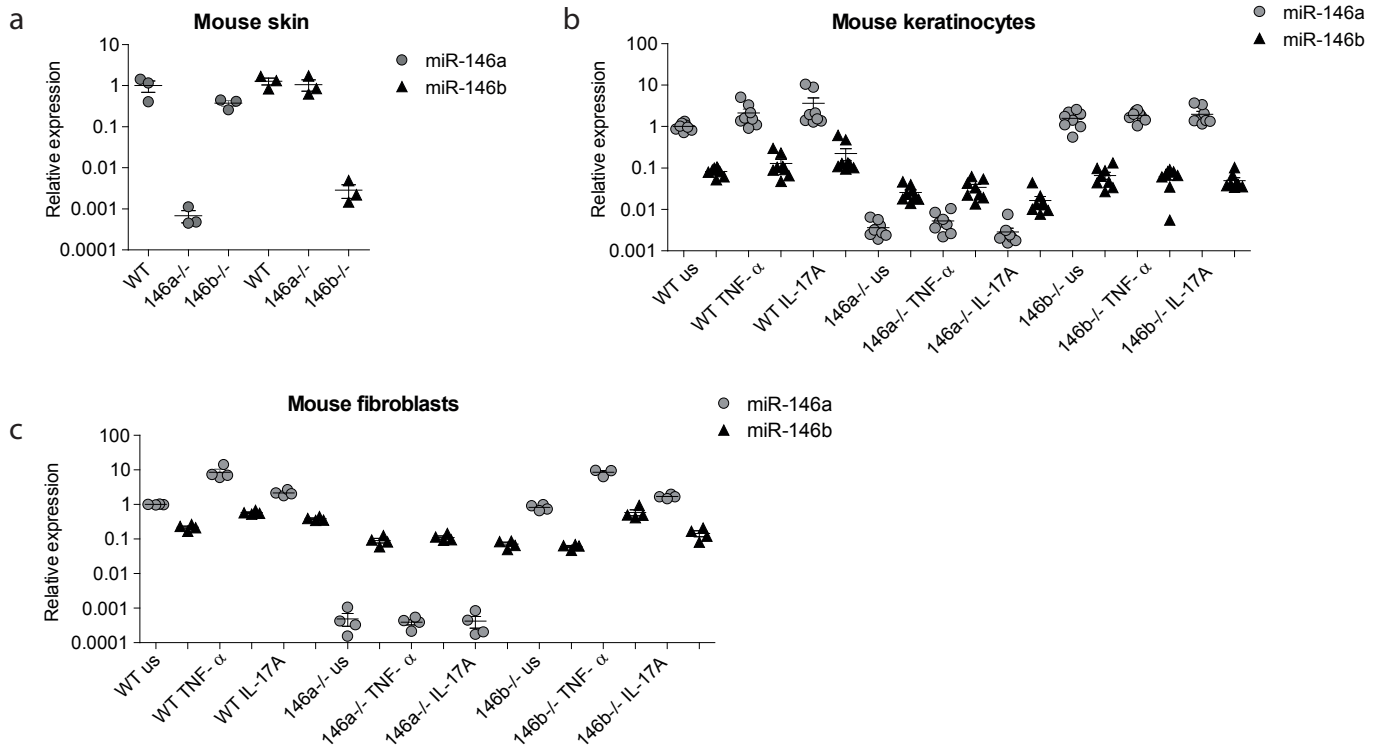

**Figure S9. Relative expression of miR-146a/b and selected target genes in the skin, keratinocytes and fibroblasts from wild type and miR-146a<sup>-/-</sup> and miR-146b<sup>-/-</sup> mice** (a) Relative expression of miR-146a/b is shown compared to the average levels of miR-146a in the skin of wild type (WT) mice (=1). Data represent mean  $\pm$  SEM of three different mouse in each group. (b and c) Relative expression of miR-146a/b and is shown compared to the level of miR-146a in unstimulated (us) keratinocytes (b) or fibroblasts (c) from WT mice (=1). Note that due to apparently lower levels of miR-146b as compared to miR-146a (at least 12-fold difference in keratinocytes and 4-fold difference in fibroblast) there is a strong crossreactivity of the miR-146b probe with miR-146a. (b and c) Data represent mean  $\pm$  SEM of eight (b) or four (c) independent stimulations of cells from two mouse in each group. (a - c) Student's t-test, \* P < 0.05, \*\* P < 0.01.

a

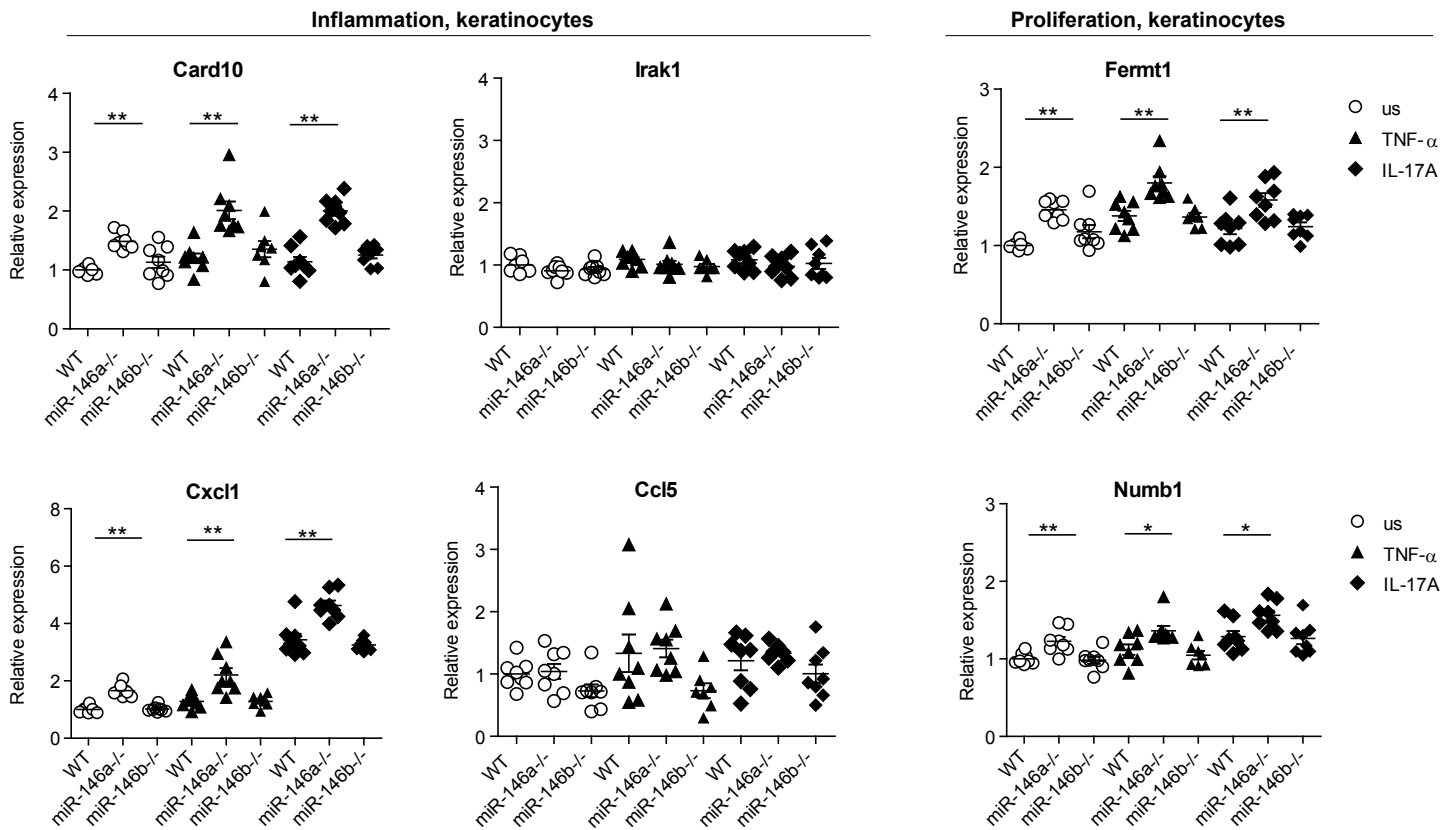

b

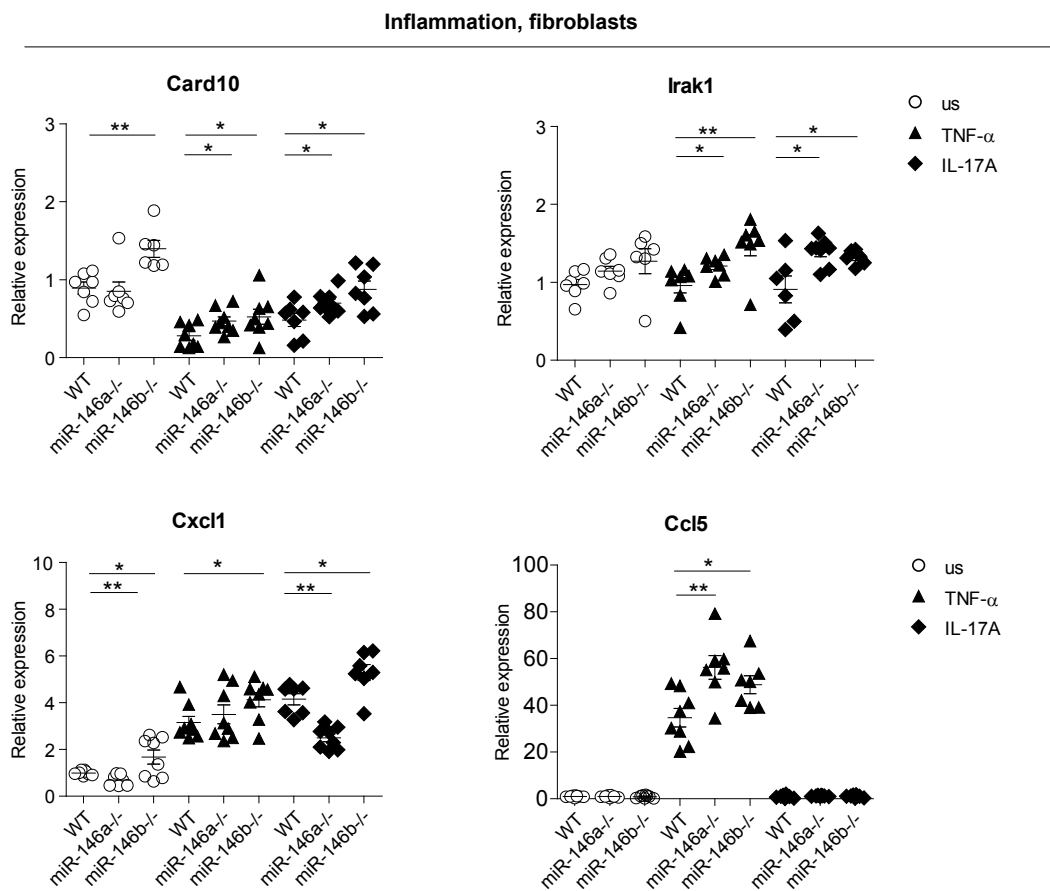

**Figure S10. Deficiency of miR-146a or miR-146b results in the increased expression of the target genes.** Keratinocytes (a) and skin fibroblast (b) from wild type (WT), miR-146a-/- or miR-146b-/- mice were stimulated with indicated cytokines for 24 h or left unstimulated (us). Data represent mean  $\pm$  SEM of eight independent stimulations of cells from two mice in each group. Relative expression compared to the value of us cells is shown. Student's t-test, \* P < 0.05, \*\* P < 0.01.

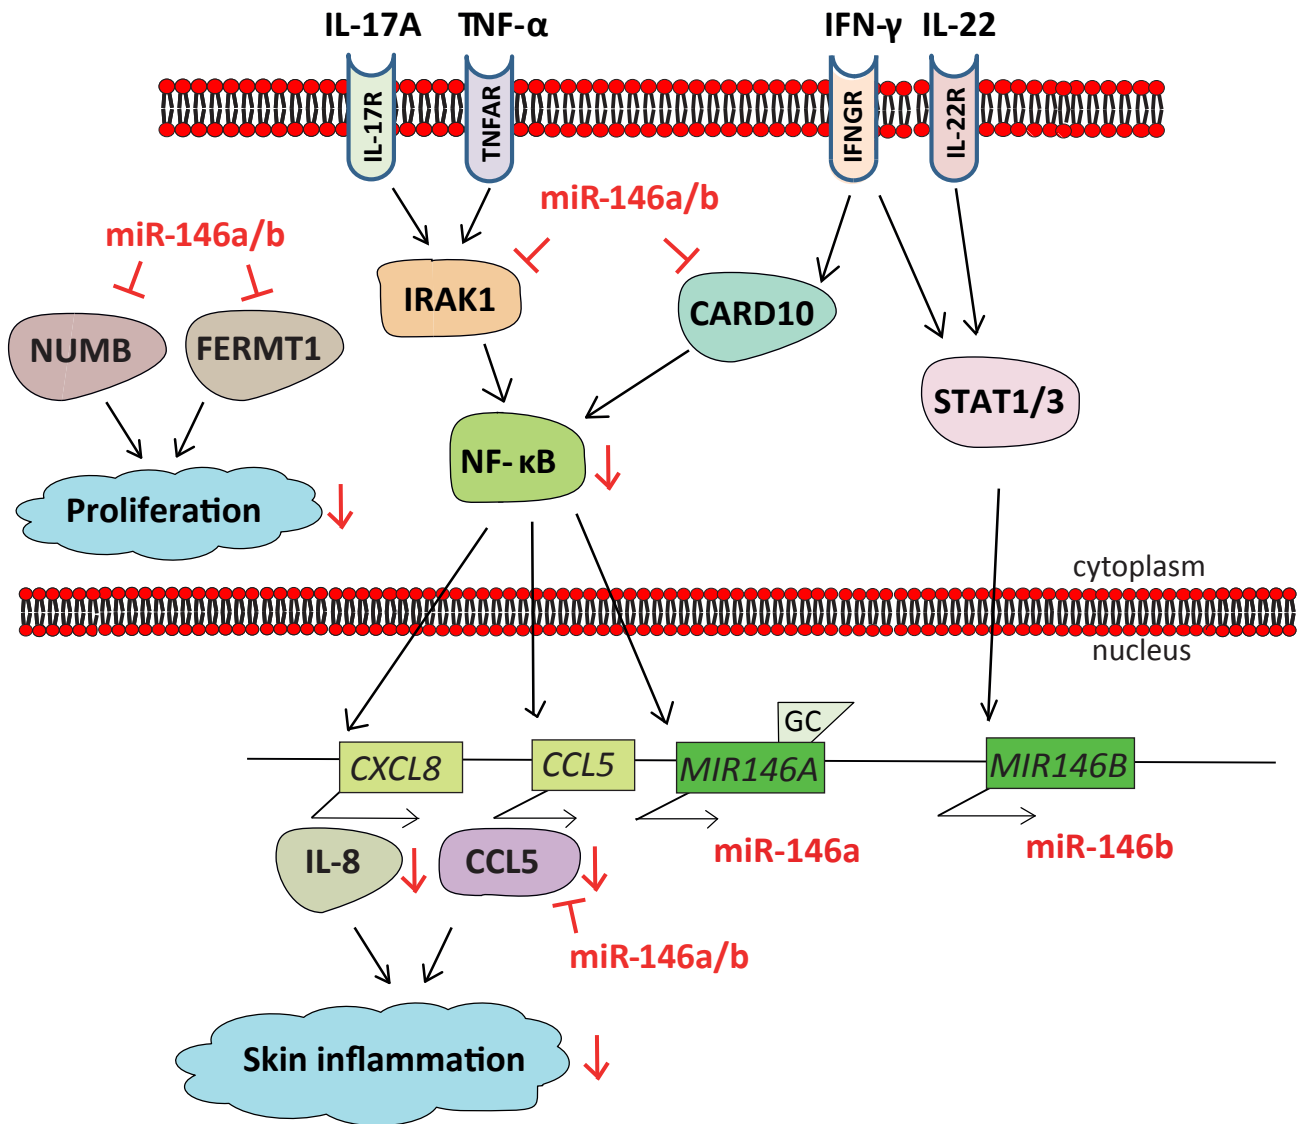

**Figure S11. The function of miR-146a/b in keratinocytes and psoriasis.** In psoriatic skin keratinocytes, the expression of miR-146a and miR-146b is increased in response to the activation of NF-κB and STAT1 (and/or STAT3), respectively. The elevated expression of miR-146a/b in turn contributes to suppression of pro-inflammatory factors, including IL-8 and CCL5, which can be activated by stimulation of TNF-α, IL-17A or IFN-γ. Previously, it has been demonstrated that the suppression of IL-8 and CCL5 by miR-146a/b occurs via targeting NF-κB signaling transducers IRAK1 or CARD10 and that CCL5 is a direct target of miR-146a. In addition to the suppression of inflammatory responses, miR-146a/b inhibit the proliferation of keratinocytes through targeting of multiple factors, including FERMT1 and NUMB. The influence of miR-146a/b to the development of psoriasis is also supported by the moderate association of polymorphisms within the miR-146a-encoding region, of which rs2910164-GC has a protective effect. It should be noted that although miR-146a/b have capacity to inhibit inflammatory responses and the proliferation of keratinocytes, the increased expression of miR-146a/b in psoriatic skin is not sufficient to fully suppress disease-related changes in the skin.

**Supplementary Table S1.** The list of psoriasis patients included in the expression analysis with RT-qPCR

| ID    | Gender | Age (years) | PASI <sup>1</sup> | Sample collection place                                 |
|-------|--------|-------------|-------------------|---------------------------------------------------------|
| P024  | M      | 62          | 14                | Dermatology Clinic, Tartu University Hospital (Estonia) |
| P025  | M      | 27          | 7,7               | Dermatology Clinic, Tartu University Hospital (Estonia) |
| P026  | M      | 41          | 16,4              | Dermatology Clinic, Tartu University Hospital (Estonia) |
| P027  | M      | 58          | 9,7               | Dermatology Clinic, Tartu University Hospital (Estonia) |
| P028  | F      | 56          | 7                 | Dermatology Clinic, Tartu University Hospital (Estonia) |
| P029  | F      | 63          | 27,6              | Dermatology Clinic, Tartu University Hospital (Estonia) |
| P030  | M      | 60          | 14,7              | Dermatology Clinic, Tartu University Hospital (Estonia) |
| P031  | M      | 51          | 25,3              | Dermatology Clinic, Tartu University Hospital (Estonia) |
| P032  | F      | 61          | 23,2              | Dermatology Clinic, Tartu University Hospital (Estonia) |
| P033  | M      | 27          | 10,1              | Dermatology Clinic, Tartu University Hospital (Estonia) |
| P034  | M      | 57          | 11,6              | Dermatology Clinic, Tartu University Hospital (Estonia) |
| P035  | M      | 56          | 25,6              | Dermatology Clinic, Tartu University Hospital (Estonia) |
| 01_01 | M      | 42          | 15                | University Hospital Kiel (Germany)                      |
| 01_06 | M      | 30          | 15                | University Hospital Kiel (Germany)                      |
| 01_07 | F      | 60          | 33                | University Hospital Kiel (Germany)                      |
| 01_08 | F      | 56          | 12                | University Hospital Kiel (Germany)                      |
| 01_09 | F      | 37          | 10                | University Hospital Kiel (Germany)                      |
| 01_10 | F      | 54          | 12                | University Hospital Kiel (Germany)                      |
| 01_11 | F      | 34          | 14                | University Hospital Kiel (Germany)                      |
| 01_17 | M      | 53          | 16,1              | University Hospital Kiel (Germany)                      |
| 01_18 | F      | 21          | 16,2              | University Hospital Kiel (Germany)                      |
| 01_21 | M      | 52          | 10,2              | University Hospital Kiel (Germany)                      |

<sup>1</sup> PASI = Psoriasis Area Severity Index

**Supplementary Table S2.** The list of genes suppressed by miR-146a in unstimulated human primary keratinocytes<sup>1</sup>

| SYMBOL    | us     |          | TNF- $\alpha$ |          | IFN- $\gamma$ |          | Differential Score |
|-----------|--------|----------|---------------|----------|---------------|----------|--------------------|
|           | cont   | miR-146a | cont          | miR-146a | cont          | miR-146a |                    |
| CARD10    | 2451.6 | 891.4    | 2664.9        | 996.5    | 2273          | 589.1    | -329.363           |
| MT1G      | 5345.7 | 1795.4   | 3089.8        | 1930.5   | 5774.6        | 1617.2   | -329.363           |
| MMP9      | 1076.8 | 358.1    | 10375         | 4446.5   | 2088.2        | 204.4    | -304.821           |
| MT1F      | 1440.2 | 609.9    | 1327.8        | 609.4    | 2100.8        | 539.2    | -258.428           |
| CSF2      | 425.8  | 111.6    | 1544.6        | 582.2    | 527.7         | 90.1     | -177.494           |
| MAOA      | 3147.9 | 1748.6   | 3054.4        | 2306.7   | 1980.2        | 1750.5   | -157.449           |
| MMP10     | 1540.2 | 845.1    | 3969.8        | 2512.9   | 1655.4        | 989.3    | -144.554           |
| IRAK1     | 2674.1 | 771.8    | 3088.2        | 1296.2   | 3404.5        | 952.3    | -143.324           |
| SLC2A3    | 1193.9 | 454.1    | 1206          | 432.8    | 3744.9        | 1798.4   | -120.57            |
| PTGS2     | 2137.2 | 734.5    | 2593          | 1368.3   | 4766.5        | 3369     | -87.973            |
| SERPINE1  | 2724.6 | 1457.6   | 2388.1        | 1226.1   | 712.9         | 411      | -82.436            |
| ERRFI1    | 1664.2 | 1092.3   | 1286.8        | 1115.8   | 1430          | 1430.5   | -82.168            |
| DDEF2     | 937    | 564.3    | 929.1         | 839.9    | 590.7         | 830.2    | -72.341            |
| TNFAIP3   | 684.9  | 366.3    | 1941.4        | 1139.5   | 1623.1        | 1072.5   | -65.42             |
| PLAU      | 7540.4 | 4935.2   | 15322.8       | 11012.3  | 9237.8        | 4360.3   | -64.46             |
| TGFA      | 1608.9 | 1001     | 2513.9        | 1714.3   | 3308.6        | 2116.1   | -60.554            |
| MT1H      | 470.8  | 123.3    | 243.2         | 52.8     | 603.5         | 141.8    | -60.205            |
| PTPRK     | 1096.2 | 581.6    | 1045.7        | 842.5    | 512.3         | 644.9    | -57.747            |
| SUMO3     | 4358.8 | 3133.3   | 4319.8        | 3427.3   | 4019.2        | 2761.4   | -56.799            |
| AIF1L     | 829.5  | 497.5    | 1534.2        | 894.6    | 2086.5        | 1586.3   | -56.047            |
| MED20     | 931.2  | 523.7    | 716           | 385.2    | 605.4         | 350.6    | -55.072            |
| IL1F9     | 938.8  | 625.6    | 3493          | 2497.6   | 2052.1        | 1338.3   | -53.085            |
| NUMB      | 1255.5 | 732.8    | 1305.7        | 870.9    | 1475.9        | 1053.4   | -51.932            |
| SPRR2F    | 4481.1 | 2895     | 12432.1       | 8996.4   | 15507.3       | 10305.7  | -50.089            |
| CXCL5     | 203.5  | 59.6     | 814.8         | 293.2    | 135.3         | 47.3     | -49.489            |
| LOC642489 | 7457.2 | 4829.8   | 9794.4        | 7096     | 11396.1       | 7182.5   | -47.667            |
| SCG5      | 771.5  | 486.9    | 626           | 570.8    | 121.3         | 152.4    | -45.071            |
| ANAPC13   | 1735.8 | 1244.7   | 1120.1        | 1063     | 834.3         | 934.9    | -43.666            |
| CHST15    | 1035.8 | 556.1    | 1416.6        | 629.4    | 1240.8        | 595.9    | -43.666            |
| DUSP22    | 1007   | 540.6    | 1209.8        | 577.9    | 1026.6        | 491.4    | -43.627            |
| LCE3D     | 1372.6 | 974      | 4911.3        | 2799.8   | 4564.9        | 2327.8   | -43.373            |
| CEACAM6   | 668.9  | 441.6    | 1320.2        | 985.5    | 2130.6        | 2144.1   | -40.095            |
| SNRNP27   | 546.2  | 276.6    | 549.6         | 283.6    | 698.8         | 378      | -38.781            |
| EFNA1     | 606.4  | 398.4    | 1614          | 1076.8   | 964.2         | 519      | -36.4              |
| SRPRB     | 816.1  | 492.1    | 739.4         | 424      | 488.4         | 247.7    | -35.522            |
| SIK3      | 377.1  | 215.4    | 347.3         | 239.8    | 387           | 294.7    | -35.496            |



|           |        |        |         |        |         |         |         |
|-----------|--------|--------|---------|--------|---------|---------|---------|
| PNLIPRP3  | 706.9  | 480.1  | 755.8   | 594.4  | 686     | 784.1   | -35.436 |
| FHL1      | 1160.4 | 553.2  | 1496    | 992.1  | 1355.4  | 723.7   | -34.699 |
| LOC644743 | 419.5  | 263.9  | 764.4   | 404.1  | 1295.6  | 544.2   | -34.404 |
| UGDH      | 352.5  | 197.3  | 245.1   | 254.7  | 326     | 395.7   | -34.288 |
| HYOU1     | 496.1  | 248.7  | 612.9   | 214.3  | 331.5   | 150     | -34.101 |
| FOXQ1     | 616.8  | 408.2  | 671.3   | 304.4  | 983.1   | 897.4   | -33.104 |
| KRT19     | 1447.1 | 917.7  | 3388.2  | 2236   | 4781.2  | 2039.2  | -32.213 |
| HERPUD1   | 1142.9 | 804.8  | 1522.5  | 1050.7 | 1007.8  | 638.7   | -32.093 |
| TMEM200A  | 857.2  | 506.7  | 722.5   | 474.7  | 381.6   | 440.4   | -31.788 |
| DEFB103B  | 3552.3 | 2092.5 | 11070.3 | 7176.4 | 21723.8 | 13218.3 | -31.638 |
| TMX1      | 345.9  | 161.9  | 208.8   | 111.5  | 205     | 295.6   | -30.584 |
| PPP4R1    | 2285.4 | 1653.8 | 2418.4  | 2000.3 | 2873.9  | 2429.1  | -30.082 |
| MARCKSL1  | 962.5  | 694.5  | 1649.3  | 1234.1 | 5653.4  | 3976.6  | -29.993 |
| PHKB      | 113.8  | 36.5   | 64.5    | -34.2  | 46.6    | 55.7    | -29.719 |
| TOR1A     | 554.5  | 339.8  | 644.7   | 312    | 483.4   | 223     | -28.636 |
| ZMPSTE24  | 1769.6 | 1008   | 1299    | 1071.5 | 564.9   | 1207.8  | -28.441 |
| FOLR3     | 994.8  | 642.8  | 1128.2  | 746.9  | 976.8   | 584.3   | -27.378 |
| RNASE7    | 1011.7 | 637.9  | 2509.9  | 1442.2 | 2983.2  | 1383    | -26.269 |
| FERMT1    | 3878.2 | 1884.8 | 6315.3  | 4680.6 | 3954.5  | 2168    | -26.034 |
| SLC10A3   | 341.9  | 135.1  | 408.7   | 114.3  | 422.8   | 127.1   | -25.761 |
| TSPAN14   | 462    | 228    | 625.2   | 170.2  | 713.2   | 291.6   | -25.761 |
| IL8       | 457.3  | 170    | 1161.4  | 657.2  | 434.1   | 135.5   | -25.42  |
| C18orf25  | 492.1  | 324.5  | 338.6   | 305.5  | 491.7   | 741.9   | -24.935 |
| TIMM17B   | 199.3  | 81.9   | 266.2   | 108.6  | 273.5   | 73.4    | -24.417 |
| TIPARP    | 1862.7 | 1427.7 | 1518.6  | 1618.3 | 1003.6  | 1369    | -24.417 |
| ST13      | 877.8  | 507.8  | 608.1   | 441.2  | 397.3   | 540.9   | -24.28  |
| LOC730820 | 828.2  | 605    | 786.7   | 841.7  | 944.2   | 1127.9  | -23.188 |
| HBEGF     | 1597.4 | 1043.8 | 4003.9  | 3018.8 | 4710.9  | 2075.1  | -23.151 |
| MTSS1     | 537.3  | 350.1  | 852.3   | 568.2  | 545.4   | 470.5   | -23.1   |
| LOC283267 | 702.9  | 498.6  | 536.3   | 498.1  | 244.4   | 264.4   | -22.922 |
| CYGB      | 1102.9 | 690.9  | 1094.9  | 1118.7 | 1028.9  | 500.2   | -22.747 |
| PLD5      | 559.1  | 377    | 644.6   | 451.3  | 414     | 446.4   | -21.817 |
| SHISA5    | 2339.7 | 1811.1 | 2537.3  | 1835   | 3088.1  | 2195    | -21.143 |
| ENC1      | 942.7  | 704.4  | 932.9   | 803.6  | 476.8   | 519     | -20.99  |
| SH3PXD2A  | 3872   | 2371.6 | 4185.1  | 2874.9 | 2692.4  | 1817.5  | -20.722 |
| ADAMTS1   | 1197.7 | 762.8  | 930.4   | 647.8  | 426.7   | 512.7   | -20.622 |
| GOLPH3L   | 187.3  | 77.5   | 127.5   | 62.1   | 100.9   | 70.6    | -20.409 |
| KRT8      | 978    | 571.8  | 1426.2  | 1137.6 | 2183.2  | 996.5   | -20.182 |
| RTTN      | 1311.3 | 982.2  | 1612.4  | 1469.3 | 985.3   | 907.3   | -20.181 |
| HIST2H2BE | 531.7  | 342.5  | 821.3   | 505.5  | 1078.6  | 672.1   | -20.017 |
| COPS8     | 303.1  | 166.5  | 212     | 52.5   | 260.9   | 170.3   | -18.483 |

|              |        |        |         |         |         |         |         |
|--------------|--------|--------|---------|---------|---------|---------|---------|
| SLC7A1       | 2465.9 | 1948.2 | 2165.3  | 2083.6  | 2452.7  | 1928.7  | -18.279 |
| SERPINB2     | 9621.4 | 5871.8 | 15360.2 | 12993.3 | 24724.1 | 14168.4 | -18.218 |
| HSP90B1      | 2386.2 | 1680.1 | 2257.8  | 2199.1  | 795.4   | 1534.6  | -18.143 |
| TXNRD1       | 853    | 553    | 923.2   | 616.2   | 559.6   | 466     | -17.775 |
| HNRNPD       | 5226   | 3897.1 | 4853.2  | 3869.8  | 4052.4  | 3036.1  | -17.056 |
| KYNU         | 270.1  | 132.9  | 318.8   | 209.1   | 200.5   | 154.3   | -16.649 |
| PTPN1        | 2069.4 | 1638.4 | 2556.1  | 1758.9  | 2621.7  | 1764.1  | -16.513 |
| ZNF512       | 358.7  | 226.6  | 228.8   | 137.8   | 281.1   | 263.5   | -16.513 |
| BNIP3L       | 437.5  | 216.5  | 421.6   | 282.2   | 252.4   | 466.5   | -16.49  |
| GFPT1        | 511.4  | 337.2  | 531.7   | 397.9   | 432.3   | 555.4   | -16.29  |
| LANCL1       | 1073.2 | 571.3  | 682.7   | 520.9   | 277.1   | 402.3   | -16.108 |
| SMAD3        | 412.4  | 270.2  | 433.2   | 262.6   | 132.3   | 114.8   | -15.591 |
| FAF2         | 1380.9 | 972.3  | 1369    | 1081.3  | 1208.4  | 1080.9  | -15.521 |
| LOC151579    | 1893   | 848.6  | 1480    | 869     | 1471.4  | 2532.2  | -15.463 |
| ODC1         | 6649.5 | 4692.5 | 9733.9  | 7144.3  | 1487.4  | 815.6   | -15.434 |
| CCDC6        | 1568.1 | 1212.3 | 1106.9  | 1199.9  | 659.9   | 1098.8  | -15.362 |
| HDAC3        | 1008.2 | 748.5  | 1045.7  | 784     | 1144.8  | 752.3   | -15.269 |
| ARMCX2       | 527.3  | 378    | 465.7   | 272.5   | 231.4   | 228     | -15.075 |
| LOC100216001 | 602.7  | 391.9  | 531.3   | 543.2   | 105.6   | 81.3    | -14.385 |
| NDEL1        | 1548.9 | 1057.9 | 2046.6  | 1472    | 2385    | 1618.1  | -14.331 |
| RHOA         | 7172.4 | 5109.9 | 7485.8  | 6039.2  | 9111.2  | 6967.7  | -14.317 |
| RHOB         | 458.3  | 283.4  | 640.2   | 223.4   | 937.7   | 524.2   | -13.772 |
| EIF4A2       | 1916.1 | 1427.9 | 1433.6  | 1646.2  | 926.4   | 1184.6  | -13.61  |
| TMEM41B      | 989.4  | 675.1  | 846.3   | 790.9   | 944.8   | 1152.5  | -13.575 |

<sup>1</sup> Keratinocytes were transfected either with control (cont) or pre-miR-146a (miR-146a) for 24 h and then stimulated with IFN- $\gamma$  or TNF- $\alpha$  for 48 h or left unstimulated (us). Average expression signals (n=3) of mRNA with differential  $P < 0.05$  (Differential Score  $< -13.00$  in unstimulated conditions) are shown.

**Supplementary Table S3.** Pathway analysis of genes suppressed by miR-146a in unstimulated keratinocytes<sup>1</sup>

| p-value  | Functional group                                 | Overlapped genes                                                                                                                                                      | Direct targets                     |
|----------|--------------------------------------------------|-----------------------------------------------------------------------------------------------------------------------------------------------------------------------|------------------------------------|
| 5.80e-03 | cell proliferation<br>(GO:0008283)<br>1809 genes | CSF2, PTGS2, SERPINE1, TNFAIP3, PLAU, TGFA,<br>PTPRK, NUMB, CXCL5, DUSP22, TMX1, MARCKSL1,<br>FERMT1, IL8, HBEGF, MTSS1, ADAMTS1, TXNRD1,<br>SMAD3, ODC1, NDEL1, RHOA | NUMB, TMX1, RHOA,<br>PTGS2, FERMT1 |

<sup>1</sup>The *P*-value from Fisher exact test showing the significance of the overlap between the target list and indicated functional group.

**Supplementary Table S4. In silico association analysis of genetic markers of MIR146A and MIR146B.<sup>1</sup>**

| Target gene<br>± 50kb  | MarkerName         | CHR       | POS              | EA/OA*         | EAF           | OR           | 95% CI             | P-value          | mapped gene                 |
|------------------------|--------------------|-----------|------------------|----------------|---------------|--------------|--------------------|------------------|-----------------------------|
| <i>miR-146a</i>        | rs2961918          | 5         | 159901408        | A>C            | 0,6341        | 1,111        | 1.041-1.186        | 0,001523         | <i>DQ658414</i>             |
| <i>miR-146a</i>        | rs2961919          | 5         | 159903134        | A>G            | 0,6778        | 1,099        | 1.033-1.169        | 0,002774         | <i>DQ658414</i>             |
| <i>miR-146a</i>        | rs888656           | 5         | 159903870        | C>G            | 0,6723        | 1,093        | 1.028-1.162        | 0,004724         | <i>DQ658414</i>             |
| <i>miR-146a</i>        | rs3096020          | 5         | 159905679        | T>C            | 0,673         | 1,092        | 1.027-1.161        | 0,005138         | <i>DQ658414</i>             |
| <b><i>miR-146a</i></b> | <b>rs2961920</b>   | <b>5</b>  | <b>159911506</b> | <b>A&gt;C</b>  | <b>0,7677</b> | <b>1,117</b> | <b>1.043-1.196</b> | <b>0,001521</b>  | <b><i>DQ658414</i></b>      |
| <i>miR-146a</i>        | rs2910164          | 5         | 159912418        | G>C            | 0,768         | 1,115        | 1.042-1.194        | 0,001761         | <i>miR-146a</i>             |
| <i>miR-146a</i>        | chr5:159913283:D   | 5         | 159913283        | CTTTAGA>C      | 0,7687        | 1,113        | 1.040-1.192        | 0,002143         | <i>DQ658414</i>             |
| <i>miR-146a</i>        | rs4921290          | 5         | 159914240        | A>T            | 0,768         | 1,115        | 1.041-1.194        | 0,001892         | <i>DQ658414</i>             |
| <i>miR-146a</i>        | rs17057868         | 5         | 159914665        | T>C            | 0,768         | 1,115        | 1.041-1.193        | 0,001918         | <i>near-DQ658414</i>        |
| <i>miR-146a</i>        | rs62390337         | 5         | 159914884        | C>T            | 0,768         | 1,115        | 1.041-1.194        | 0,001858         | <i>near-DQ658414</i>        |
| <i>miR-146a</i>        | rs61665417         | 5         | 159918335        | C>T            | 0,7195        | 1,097        | 1.028-1.170        | 0,005085         | <i>near-DQ658414</i>        |
| <b><i>miR-146a</i></b> | <b>rs184776122</b> | <b>5</b>  | <b>159949791</b> | <b>A&lt;C</b>  | <b>0,0565</b> | <b>0,799</b> | <b>0.682-0.935</b> | <b>0,005075</b>  | <b><i>near-DQ658414</i></b> |
| <i>CARD10</i>          | rs760721           | 22        | 37905645         | G<C            | 0,273         | 1,111        | 1.034-1.194        | 0,004052         | <i>CARD10</i>               |
| <b><i>CARD10</i></b>   | <b>37905648:D</b>  | <b>22</b> | <b>37905648</b>  | <b>C&lt;CG</b> | <b>0,2541</b> | <b>1,128</b> | <b>1.046-1.217</b> | <b>0,001842</b>  | <b><i>CARD10</i></b>        |
| <i>CARD10</i>          | rs760722           | 22        | 37905649         | C<G            | 0,2757        | 1,112        | 1.034-1.195        | 0,003984         | <i>CARD10</i>               |
| <b><i>CARD10</i></b>   | <b>rs7293163</b>   | <b>22</b> | <b>37937829</b>  | <b>G&lt;C</b>  | <b>0,3004</b> | <b>1,140</b> | <b>1.065-1.220</b> | <b>0,0001667</b> | <b><i>near-CDC42EP1</i></b> |
| <i>CARD10</i>          | rs9610795          | 22        | 37939510         | T<G            | 0,3547        | 1,110        | 1.039-1.185        | 0,001893         | <i>near-CDC42EP1</i>        |
| <i>CARD10</i>          | rs7286403          | 22        | 37948293         | A<T            | 0,3007        | 1,121        | 1.050-1.196        | 0,0006073        | <i>near-CDC42EP1</i>        |
| <i>CARD10</i>          | rs6519071          | 22        | 37949320         | A<G            | 0,2949        | 1,104        | 1.037-1.176        | 0,002053         | <i>near-CDC42EP1</i>        |
| <i>CARD10</i>          | rs11703240         | 22        | 37950124         | A<G            | 0,2957        | 1,103        | 1.036-1.174        | 0,002234         | <i>near-CDC42EP1</i>        |
| <i>CARD10</i>          | rs9610801          | 22        | 37950530         | A<G            | 0,2862        | 1,106        | 1.036-1.180        | 0,002463         | <i>near-CDC42EP1</i>        |
| <i>CARD10</i>          | rs9610803          | 22        | 37951026         | G<A            | 0,2666        | 1,111        | 1.038-1.189        | 0,002363         | <i>near-CDC42EP1</i>        |
| <i>CARD10</i>          | rs5995460          | 22        | 37951451         | G<A            | 0,309         | 1,093        | 1.027-1.163        | 0,005152         | <i>near-CDC42EP1</i>        |
| <i>CARD10</i>          | rs2064133          | 22        | 37952493         | G<A            | 0,3039        | 1,100        | 1.033-1.170        | 0,002814         | <i>near-CDC42EP1</i>        |
| <i>CARD10</i>          | rs5845350          | 22        | 37952547         | TG<T           | 0,3091        | 1,092        | 1.026-1.162        | 0,005667         | <i>near-CDC42EP1</i>        |
| <i>CARD10</i>          | rs1016106          | 22        | 37952731         | C<G            | 0,3036        | 1,099        | 1.033-1.170        | 0,002894         | <i>near-CDC42EP1</i>        |

|               |            |    |          |                         |        |       |             |           |                 |
|---------------|------------|----|----------|-------------------------|--------|-------|-------------|-----------|-----------------|
| <i>CARD10</i> | rs1016107  | 22 | 37952779 | T<C                     | 0,2957 | 1,102 | 1.035-1.173 | 0,002439  | near-CDC42EP1   |
| <i>CARD10</i> | rs8142783  | 22 | 37953050 | A<G                     | 0,3035 | 1,100 | 1.033-1.170 | 0,002841  | near-CDC42EP1   |
| <i>CARD10</i> | rs1016108  | 22 | 37953067 | G<A                     | 0,2952 | 1,102 | 1.034-1.173 | 0,002533  | near-CDC42EP1   |
| <i>CARD10</i> | rs2064134  | 22 | 37953424 | A<G                     | 0,3039 | 1,100 | 1.033-1.170 | 0,002845  | near-CDC42EP1   |
| <i>CARD10</i> | rs2267365  | 22 | 37955081 | G<T                     | 0,2969 | 1,100 | 1.033-1.171 | 0,003101  | near-CDC42EP1   |
| <i>CARD10</i> | rs7284657  | 22 | 37955197 | G<A                     | 0,3048 | 1,097 | 1.030-1.167 | 0,003835  | near-CDC42EP1   |
| <i>CARD10</i> | rs9610804  | 22 | 37956214 | G<A                     | 0,3034 | 1,104 | 1.037-1.175 | 0,001896  | near-CDC42EP1   |
| <i>CARD10</i> | rs8140986  | 22 | 37956840 | C<A                     | 0,3133 | 1,095 | 1.029-1.165 | 0,00437   | near-CDC42EP1   |
| <i>CARD10</i> | rs2235335  | 22 | 37958163 | C<G                     | 0,3035 | 1,105 | 1.038-1.177 | 0,001711  | <i>CDC42EP1</i> |
| <i>CARD10</i> | rs2235336  | 22 | 37958268 | G<A                     | 0,3034 | 1,106 | 1.039-1.177 | 0,001594  | <i>CDC42EP1</i> |
| <i>CARD10</i> | rs2235337  | 22 | 37958312 | G<A                     | 0,307  | 1,101 | 1.034-1.172 | 0,002585  | <i>CDC42EP1</i> |
| <i>CARD10</i> | 37958775:D | 22 | 37958775 | T<TC                    | 0,2957 | 1,111 | 1.043-1.183 | 0,001137  | <i>CDC42EP1</i> |
| <i>CARD10</i> | rs34912439 | 22 | 37958776 | C<CA                    | 0,2953 | 1,111 | 1.04-1.183  | 0,001099  | <i>CDC42EP1</i> |
| <i>CARD10</i> | rs5995463  | 22 | 37959214 | C<T                     | 0,3421 | 1,098 | 1.032-1.168 | 0,003027  | <i>CDC42EP1</i> |
| <i>CARD10</i> | rs2076088  | 22 | 37960725 | G<T                     | 0,2851 | 1,138 | 1.062-1.220 | 0,0002778 | <i>CDC42EP1</i> |
| <i>CARD10</i> | rs5756728  | 22 | 37961266 | C<T                     | 0,4075 | 1,109 | 1.043-1.178 | 0,000897  | <i>CDC42EP1</i> |
| <i>CARD10</i> | rs5756729  | 22 | 37961353 | C<T                     | 0,4077 | 1,105 | 1.040-1.175 | 0,001235  | <i>CDC42EP1</i> |
| <i>CARD10</i> | rs5756732  | 22 | 37961847 | G<A                     | 0,3985 | 1,098 | 1.033-1.167 | 0,002666  | <i>CDC42EP1</i> |
| <i>CARD10</i> | rs5756733  | 22 | 37961949 | C<T                     | 0,404  | 1,106 | 1.041-1.175 | 0,001167  | <i>CDC42EP1</i> |
| <i>CARD10</i> | rs2281098  | 22 | 37964299 | C<G                     | 0,4197 | 1,096 | 1.033-1.162 | 0,002455  | <i>CDC42EP1</i> |
| <i>CARD10</i> | rs66468174 | 22 | 37964408 | CCAGCGCCTGCTGCAAACCCT<C | 0,4454 | 1,090 | 1.027-1.158 | 0,005022  | <i>CDC42EP1</i> |

<sup>1</sup>Listed are only associated variants after Bonferroni-correction. Variants marked in bold are the lead SNPs of independent LD-blocks, separated by solid lines.

<sup>2</sup>CHR, chromosome

<sup>3</sup>POS, position in the genome according to UCSC genome build 37, hg19 (2009)

<sup>4</sup>EA/OA, effect allele/other allele, all variants are mapped on the forward strand

<sup>5</sup>EAF, effect allele frequency

<sup>6</sup>OR, odds ratio

<sup>7</sup>CI, confidence interval

**Supplementary Table S5.** Association analysis of rs2910164 in the *MIR146A* gene in psoriasis patients and controls

| Allele/Genotype<br>rs2910164         | Cases, n (%) n=4167 |                        | Controls, n (%) n=7971    | P-value       | OR [95% CI]             |
|--------------------------------------|---------------------|------------------------|---------------------------|---------------|-------------------------|
| G                                    | 6525 (0.783)        |                        | 12148 (0.762)             |               | 1                       |
| C                                    | 1809 (0.217)        |                        | 3794 (0.238)              | 6.79E-04      | 0.89 (0.84-0.95)        |
| GG                                   | 2572 (0.617)        |                        | 4615 (0.579)              |               | 1                       |
| GC                                   | 1381 (0.331)        |                        | 2918 (0.366)              | 2.92E-04      | 0.86 (0.79-0.93)        |
| CC                                   | 214 (0.055)         |                        | 438 (0.055)               | 0.1361        | 0.88 (0.81-1.04)        |
| GG/GC                                | 3953 (0.949)        |                        | 7533 (0.945)              |               | 1                       |
| CC                                   | 214 (0.051)         |                        | 438 (0.055)               | 0.3803        | 0.93 (0.78-1.1)         |
| Stratified by HLA-Cw*0602            |                     |                        |                           |               |                         |
| Allele/Genotype<br>rs2910164         | HLA-<br>Cw*0602     | Cases, n (%)<br>n=4167 | Controls, n (%)<br>n=7971 | P-value       | OR [95% CI]             |
| G                                    | -                   | 3240 (0.785)           | 10113 (0.764)             |               | 1                       |
| <b>C</b>                             | -                   | <b>890 (0.215)</b>     | <b>3123 (0.236)</b>       | <b>0.0092</b> | <b>0.89 (0.82-0.97)</b> |
| G                                    | +                   | 3285 (0.718)           | 2035 (0.752)              |               | 1                       |
| <b>C</b>                             | +                   | <b>919 (0.219)</b>     | <b>671 (0.248)</b>        | <b>0.0063</b> | <b>0.85 (0.76-0.96)</b> |
| GG                                   | -                   | 1286 (0.623)           | 3856 (0.583)              |               | 1                       |
| <b>GC</b>                            | -                   | <b>668 (0.323)</b>     | <b>2401 (0.363)</b>       | <b>0.0016</b> | <b>0.84 (0.75-0.94)</b> |
| CC                                   | -                   | 111 (0.054)            | 361 (0.055)               | 0.4550        | 0.92 (0.82-1.15)        |
| GG                                   | +                   | 1286 (0.612)           | 759 (0.561)               |               | 1                       |
| <b>GC</b>                            | +                   | <b>713 (0.339)</b>     | <b>517 (0.382)</b>        | <b>0.0123</b> | <b>0.83 (0.72-0.96)</b> |
| <b>CC</b>                            | +                   | <b>103 (0.049)</b>     | <b>77 (0.057)</b>         | <b>0.0986</b> | <b>0.77 (0.66-1.05)</b> |
| GG/GC                                | -                   | 1954 (0.946)           | 6257 (0.945)              |               | 1                       |
| CC                                   | -                   | 111 (0.054)            | 361 (0.055)               | 0.8393        | 0.98 (0.78-1.22)        |
| GG/GC                                | +                   | 1999 (0.951)           | 1276 (0.943)              |               | 1                       |
| CC                                   | +                   | 103 (0.049)            | 77 (0.057)                | 0.2204        | 0.82 (0.6-1.12)         |
| Recessive association model analysis |                     |                        |                           |               |                         |
| Allele/Genotype<br>rs2910164         | HLA-<br>Cw*0602     | Cases, n (%)<br>n=4167 | Controls, n (%)<br>n=7971 | P-value       | OR [95% CI]             |
| GG                                   | -                   | 1286 (0.309)           | 3856 (0.484)              |               | 1                       |
| <b>GC</b>                            | -                   | <b>668 (0.160)</b>     | <b>2401 (0.301)</b>       | <b>0.0018</b> | <b>0.84 (0.76-0.94)</b> |
| CC                                   | -                   | 111 (0.027)            | 361 (0.045)               | 0.4825        | 0.92 (0.83-1.16)        |
| GG                                   | +                   | 1286 (0.309)           | 759 (0.095)               | 1.39E-182     | 5.19 (4.66-5.78)        |
| GC                                   | +                   | 713 (0.171)            | 517 (0.065)               | 5.42E-103     | 4.28 (3.84-5.37)        |
| CC                                   | +                   | 103 (0.025)            | 77 (0.010)                | 5.13E-19      | 4.06 (3.64-5.09)        |
| GG/GC                                | -                   | 1954 (0.469)           | 6257 (0.785)              |               | 1                       |
| CC                                   | -                   | 111 (0.027)            | 361 (0.045)               | 0.8694        | 0.98 (0.79-1.23)        |
| GG/GC                                | +                   | 1999 (0.480)           | 1276 (0.160)              | 2.46E-286     | 5.13 (4.11-5.61)        |
| CC                                   | +                   | 103 (0.025)            | 77 (0.010)                | 6.87E-21      | 4.32 (3.46-5.86)        |
